# Supplementary material for: The Pharmacological or Genetic Blockade of Endogenous De Novo Fatty Acid Synthesis Does Not Increase the Uptake of Exogenous Lipids in Ovarian Cancer Cells
Source: PubMed Central journal article supplement (PMC8076863; doi:10.3389/fonc.2021.610885), 2021-04-13
Supplement: Table_1.pdf [file Table_1.pdf]

**Supplementary Table S1.** Withdrawal of lipids from the serum of the culture medium causes neither cell cycle arrest nor apoptosis. Means  $\pm$  SD of at least three independent experiments (for details see Supplementary materials and methods section).

|                     | Cell Cycle       |                  |                 | Apoptosis                       |
|---------------------|------------------|------------------|-----------------|---------------------------------|
|                     | G0/1 (%)         | S (%)            | G2/M (%)        | Cleaved Caspase -3 Positive (%) |
| <b>FCS + Lipids</b> | 71,07 $\pm$ 3,85 | 21,69 $\pm$ 4,41 | 7,24 $\pm$ 1,06 | 1,65 $\pm$ 1,01                 |
| <b>FCS – Lipids</b> | 71,85 $\pm$ 5,84 | 20,13 $\pm$ 2,77 | 8,02 $\pm$ 2,27 | 5,34 $\pm$ 2,40                 |
